# Supplementary material for: Facile synthesis of hollow mesoporous nickel sulfide nanoparticles for highly efficient combinatorial photothermal–chemotherapy of cancer
Source: Royal Society of Chemistry journal article supplement (doi:10.1039/d0tb01448f), 2020-01-01
Supplement: d0tb01448f1.pdf [file d0tb01448f1.pdf]

## Supporting Information

### **Facile Synthesis of Hollow Mesoporous Nickel Sulfide Nanoparticles for Highly efficient Combinatorial Photothermal-Chemotherapy of Cancer**

Ruihao Yang<sup>a, b</sup>, Ruidong Li<sup>a, b</sup>, Lei Zhang<sup>c</sup>, Zhigang Xu<sup>a, b</sup>, Yuejun Kang<sup>a, b</sup>, Peng Xue<sup>a, b\*</sup>

<sup>a</sup> State Key Laboratory of Silkworm Genome Biology, School of Materials and Energy, Southwest University, Chongqing 400715, China. E-mail: [xuepeng@swu.edu.cn](mailto:xuepeng@swu.edu.cn)

<sup>b</sup> Chongqing Engineering Research Center for Micro-Nano Biomedical Materials and Devices, Southwest University, Chongqing 400715, China.

<sup>c</sup> State Key Laboratory of Silkworm Genome Biology, College of Biotechnology, Southwest University, Chongqing 400716, China.

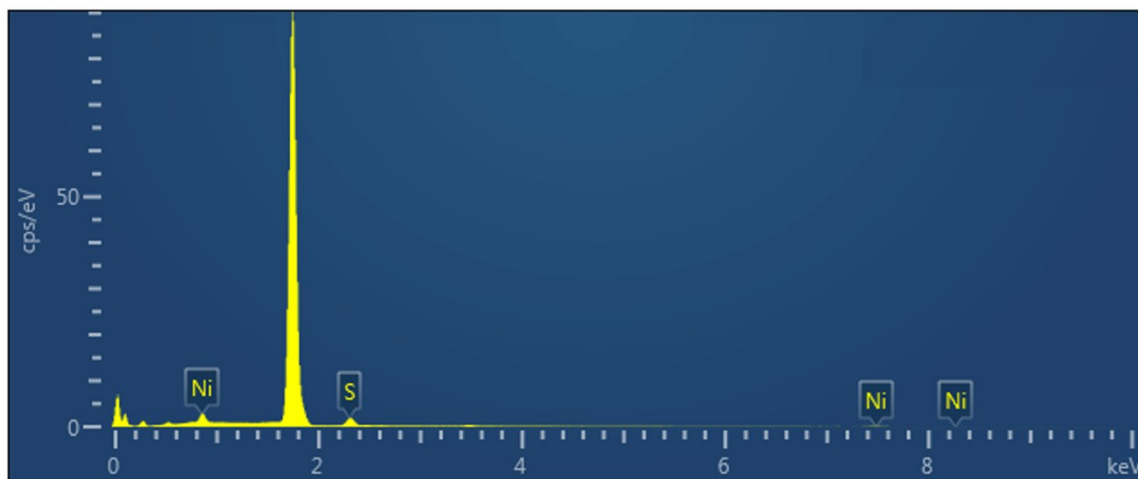

**Fig. S1** EDS pattern of hm-NiS NPs.

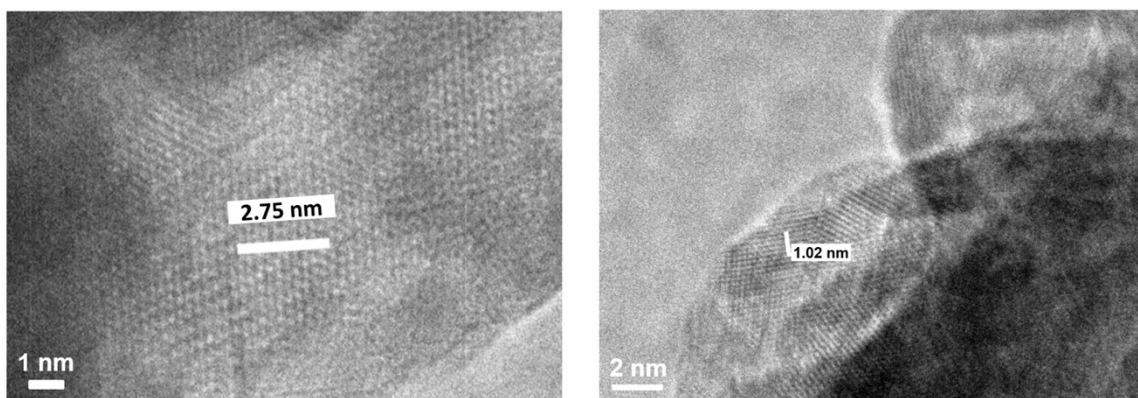

**Fig. S2** High resolution (HR) TEM image of hm-NiS NPs.

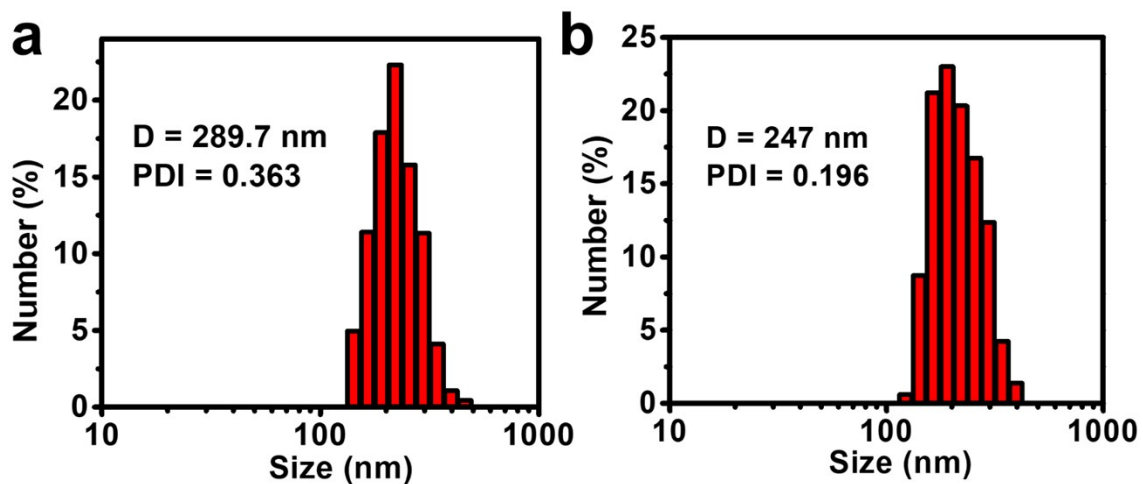

**Fig. S3** Hydrodynamic size distribution of (a) hm-NiS NPs and (b) NiPPD NPs characterized by dynamic light scattering (DLS).

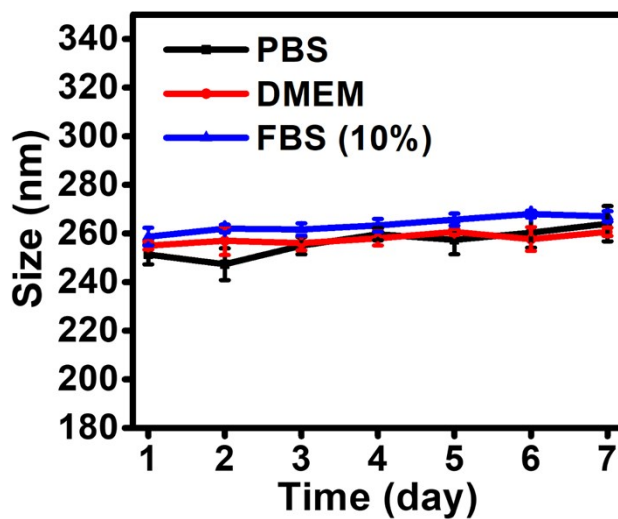

**Fig. S4** Long-term stability of NiPPD NPs under physiological condition, assessed by monitoring the hydrodynamic size in in PBS, DMEM and FBS (10%) for seven days.

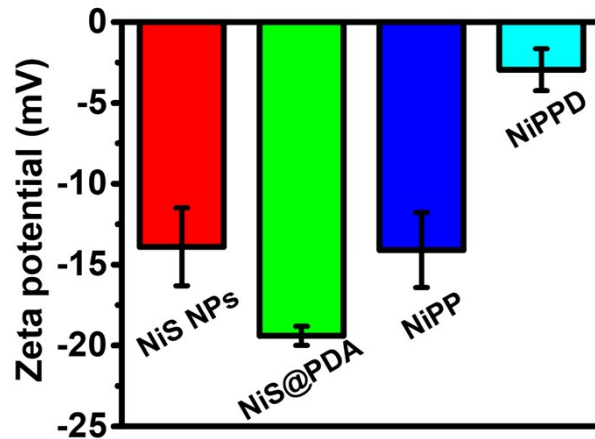

**Fig. S5** Zeta potential of hm-NiS, hm-NiS@PDA, NiPP and NiPPD NPs.

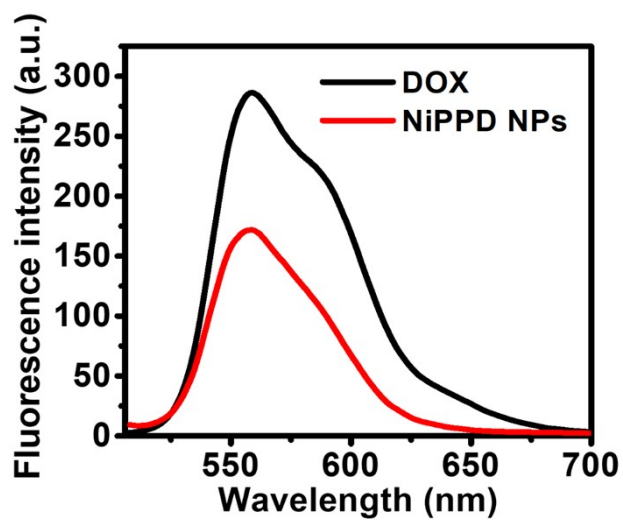

**Fig. S6** Fluorescence spectra of DOX and NiPPD NPs (equivalent DOX concentration at  $0.7 \mu\text{g}\cdot\text{mL}^{-1}$ ,  $\lambda_{\text{ex}} = 480 \text{ nm}$ ).

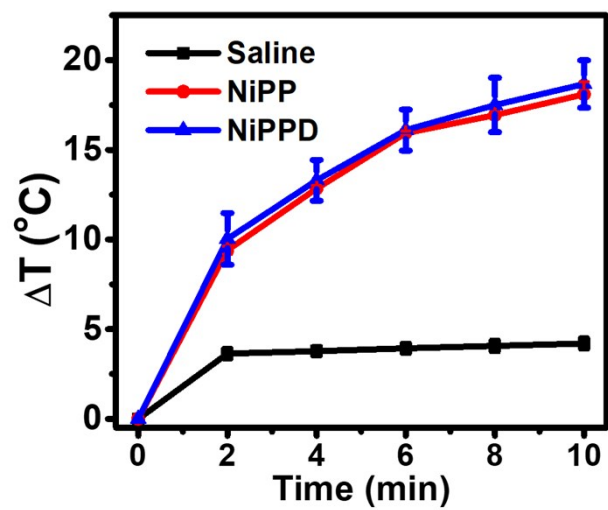

**Fig. S7** Temperature change in tumor region during NIR laser irradiation for 10 min, corresponding to Fig. 6a.

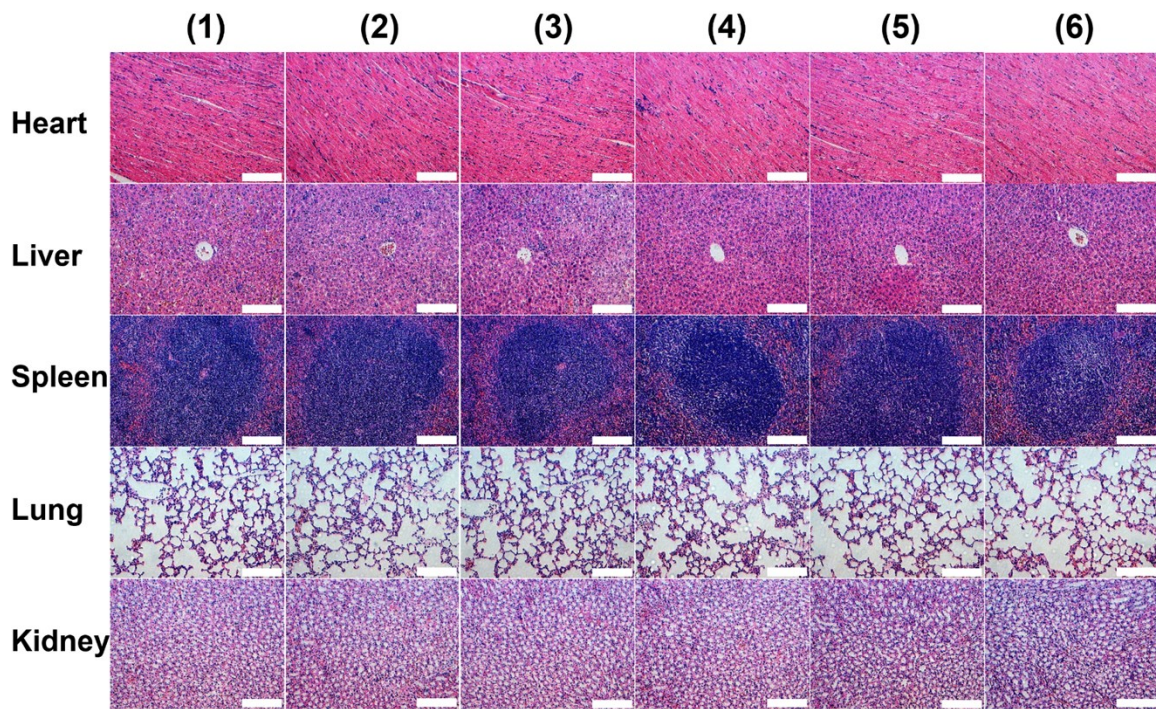

**Fig. S8** H&E stained sections sliced from major organs after the mice receiving various treatments (scale bar: 200  $\mu\text{m}$ ).

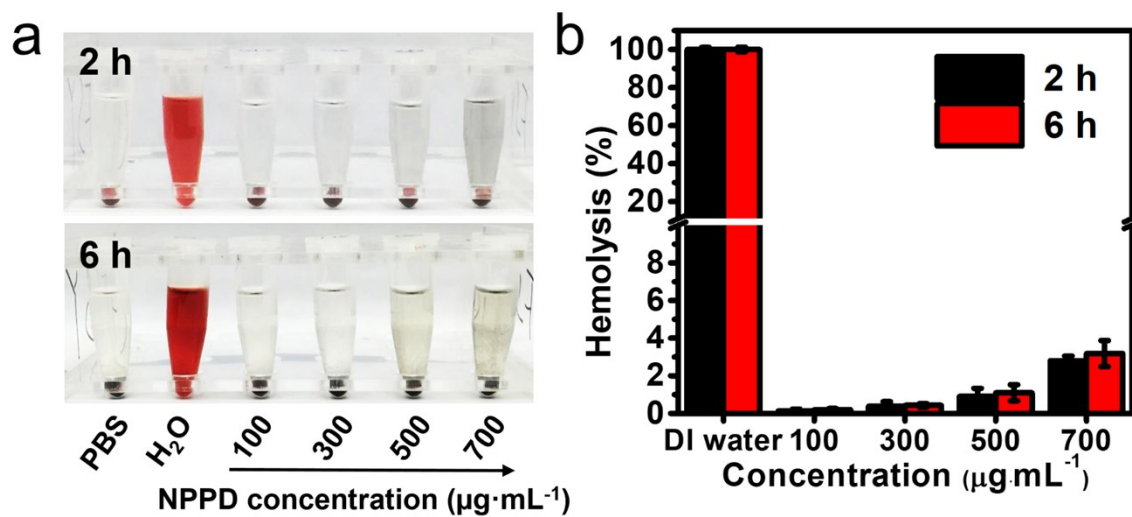

**Fig. S9** Hemolysis assay. (a) Image of centrifuge tube containing RBCs after incubating with DI water, PBS or NiPPD NPs at different concentrations for 2 h and 6 h; (b) corresponding hemolysis rate.

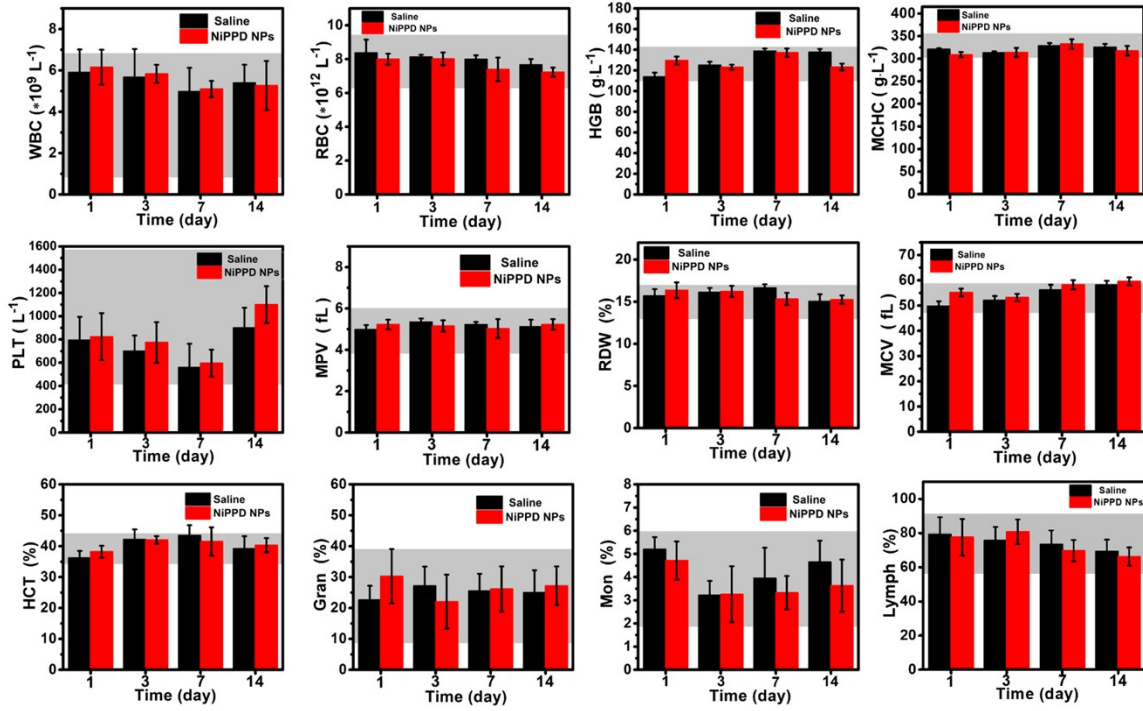

**Fig. S10** Key indicators of blood routine test on KM mice after being injected with NiPPD NPs. The grey hatched areas represent the reference ranges of hematology index of healthy mice.
